# Supplementary material
Source: publisher site journal article supplement (https://www.dovepress.com/article/465093)
Supplement: Supplementary file 1 [file get_supplementary_file.php]

**Table S1 Primers used in RT-qPCR analysis**

| Primer name | Primer sequence (5' - 3') |
| --- | --- |
| Il1b-F | ATTATGTCCTGACCACTGTT |
| Il1b-R | ATCCCAAGCAATACCCAAA |
| Fcgr1-F | ACTGTCACTGGGAGGAAG |
| Fcgr1-R | AGCAAGTTAGAAGCGATGG |
| Isg15-F | CTGTACCACTAGCATCACT |
| Isg15-R | AGAACTGAAGAAGCAGATTG |
| Parp12-F | CCAGGGAGAGTTAAGTTTCA |
| Parp12-R | TTGTCAGAGTAGCATAGTGG |
| Mt2-F | TGGGCTGTGCGAAGTGCTCC |
| Mt2-R | GGCTAGGCTTCTACATGGTCT |
| Trim47-M-F | GACTCCACATCTTCTGAGCC |
| Trim47-AS-F | CTCCACATCTGCTTCTGAGCC |
| Trim47-M/AS-R | CCCTCATCTCAGCCTGTGCC |
| mus-GAPDH-F | GGAGATGCTCAGTGTTGG |
| mus-GAPDH-R | TGACAATGAATACGGCTACA |


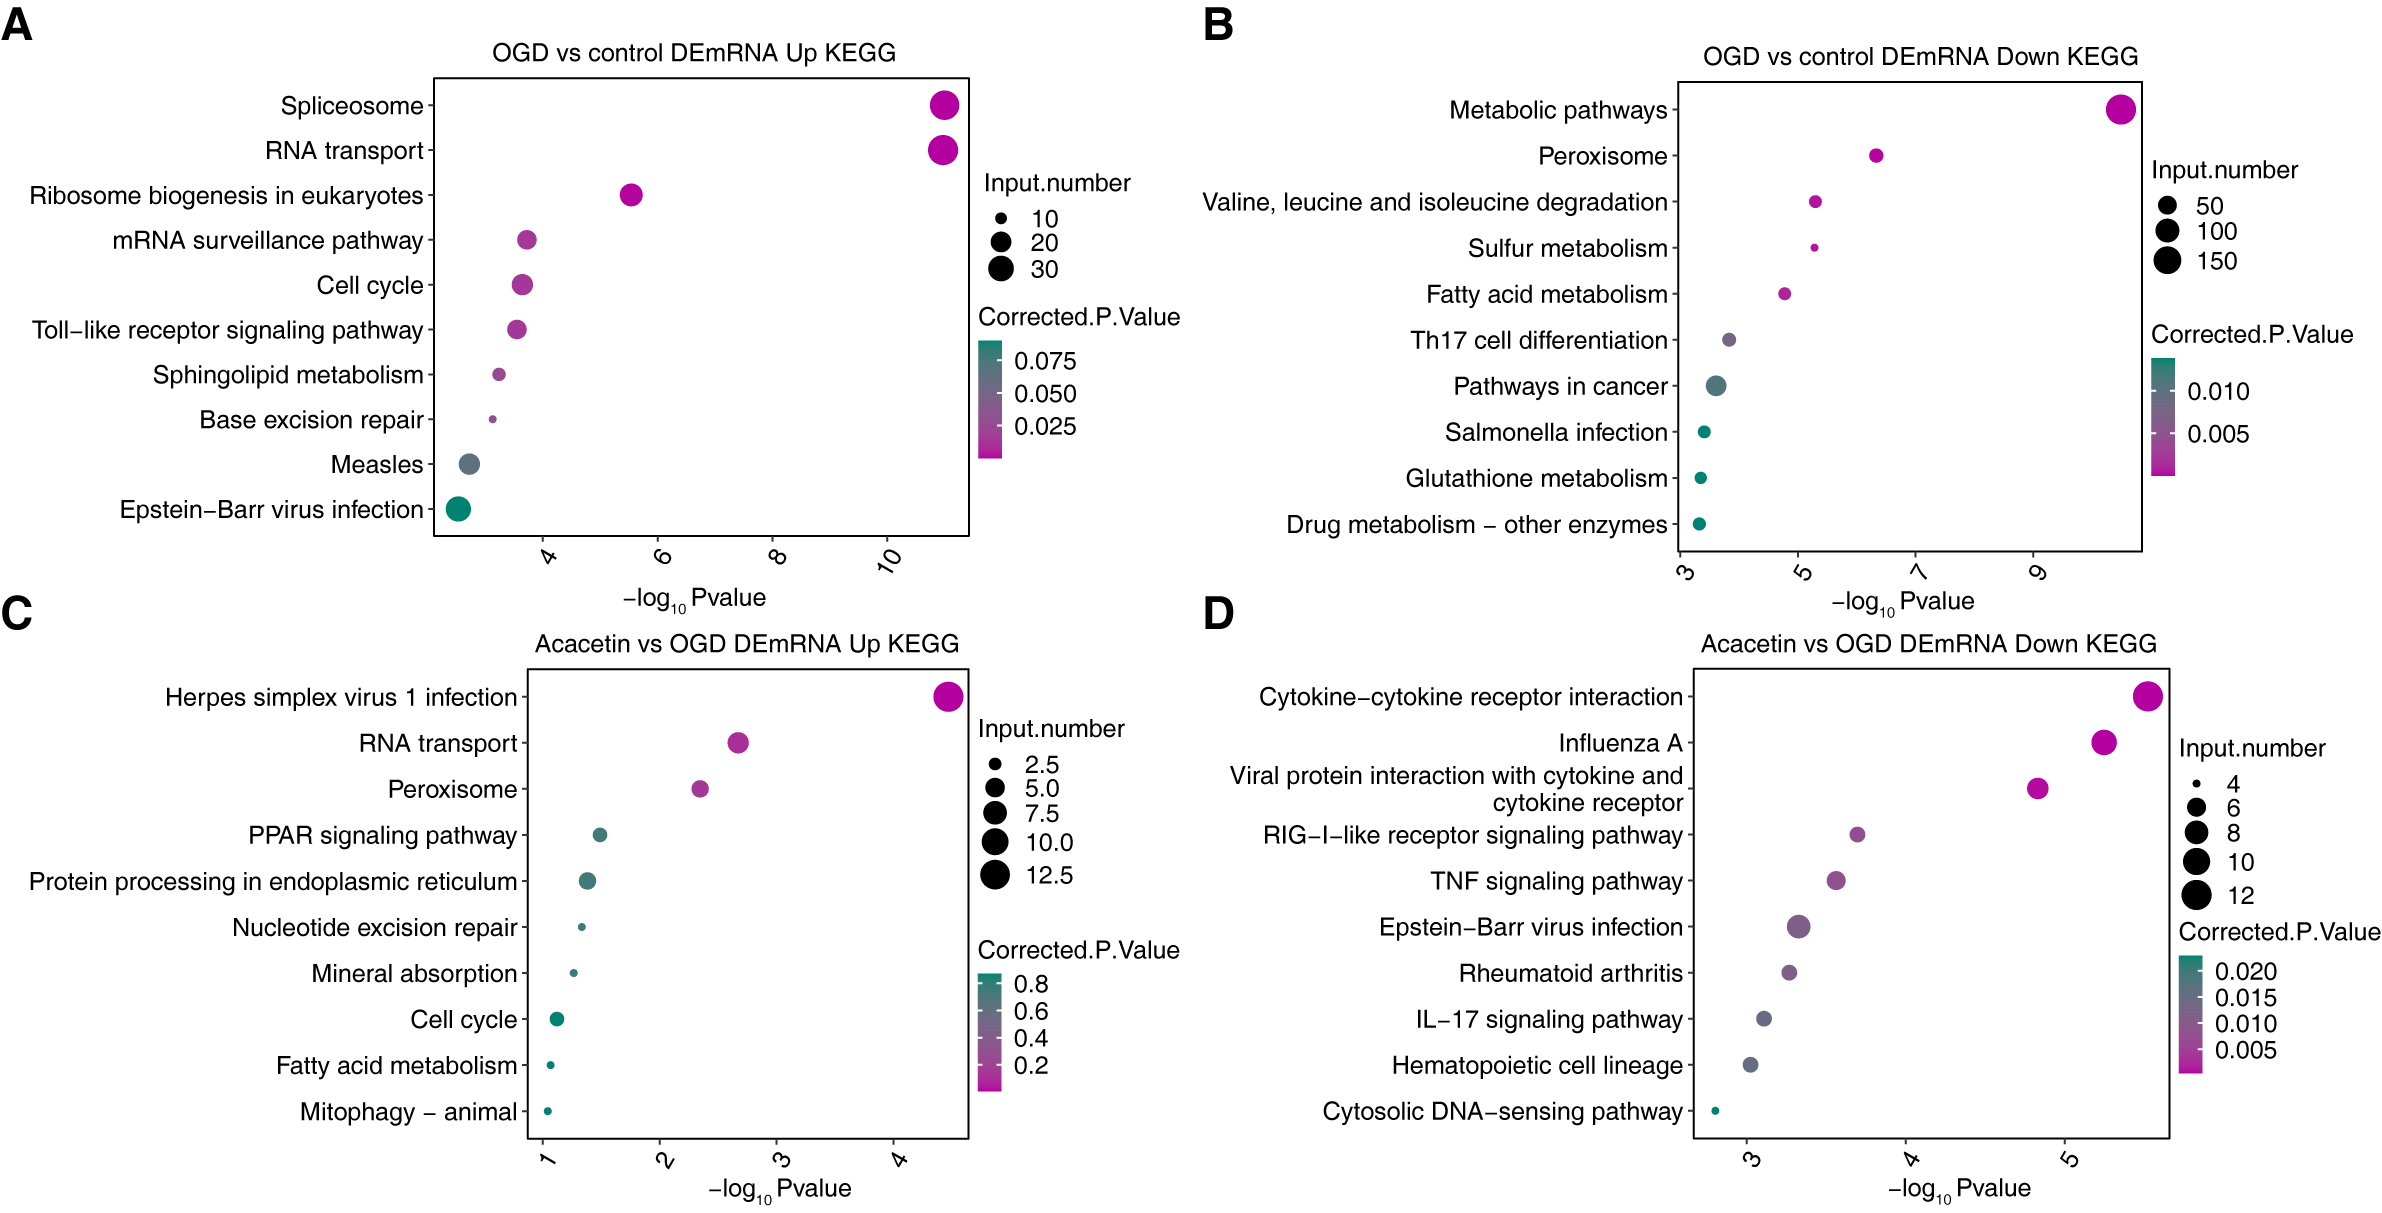


**FigS1.** KEGG enrichment results of differentially expressed genes between groups. (A-B) Bubble Diagram exhibiting the most enriched KEGG pathways of the up-regulated and down-regulated DEGs in the group OGD vs control. (C-D) Bubble Diagram exhibiting the most enriched KEGG pathways of the up-regulated and down-regulated DEGs in the group Acacetin vs OGD.


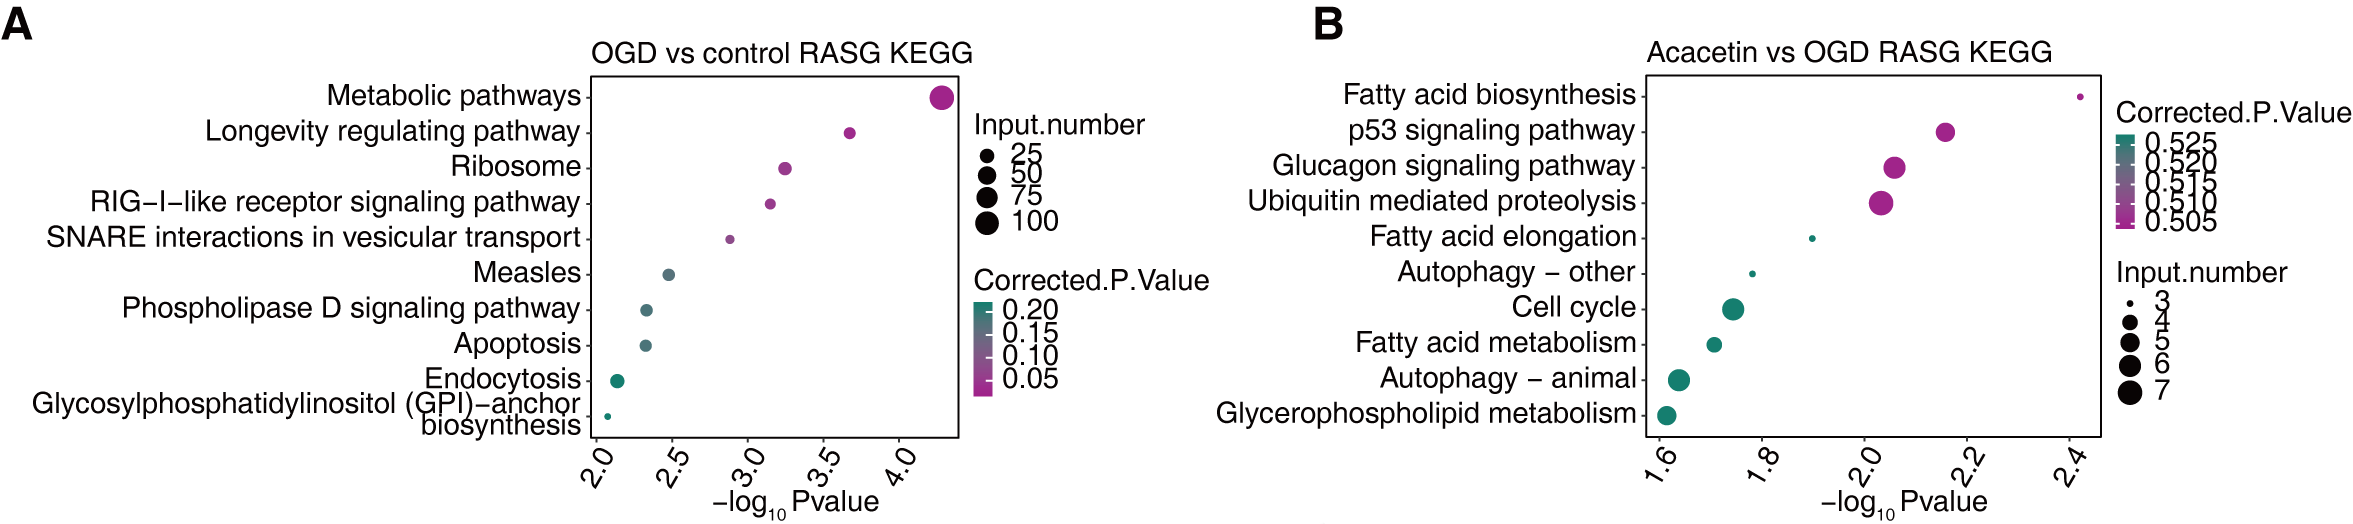


**FigS2.** KEGG enrichment analysis of differential AS-related genes and regulation of AS events. (A-B) Bubble Diagram exhibiting the most enriched KEGG pathways of the RASEs in the two groups.


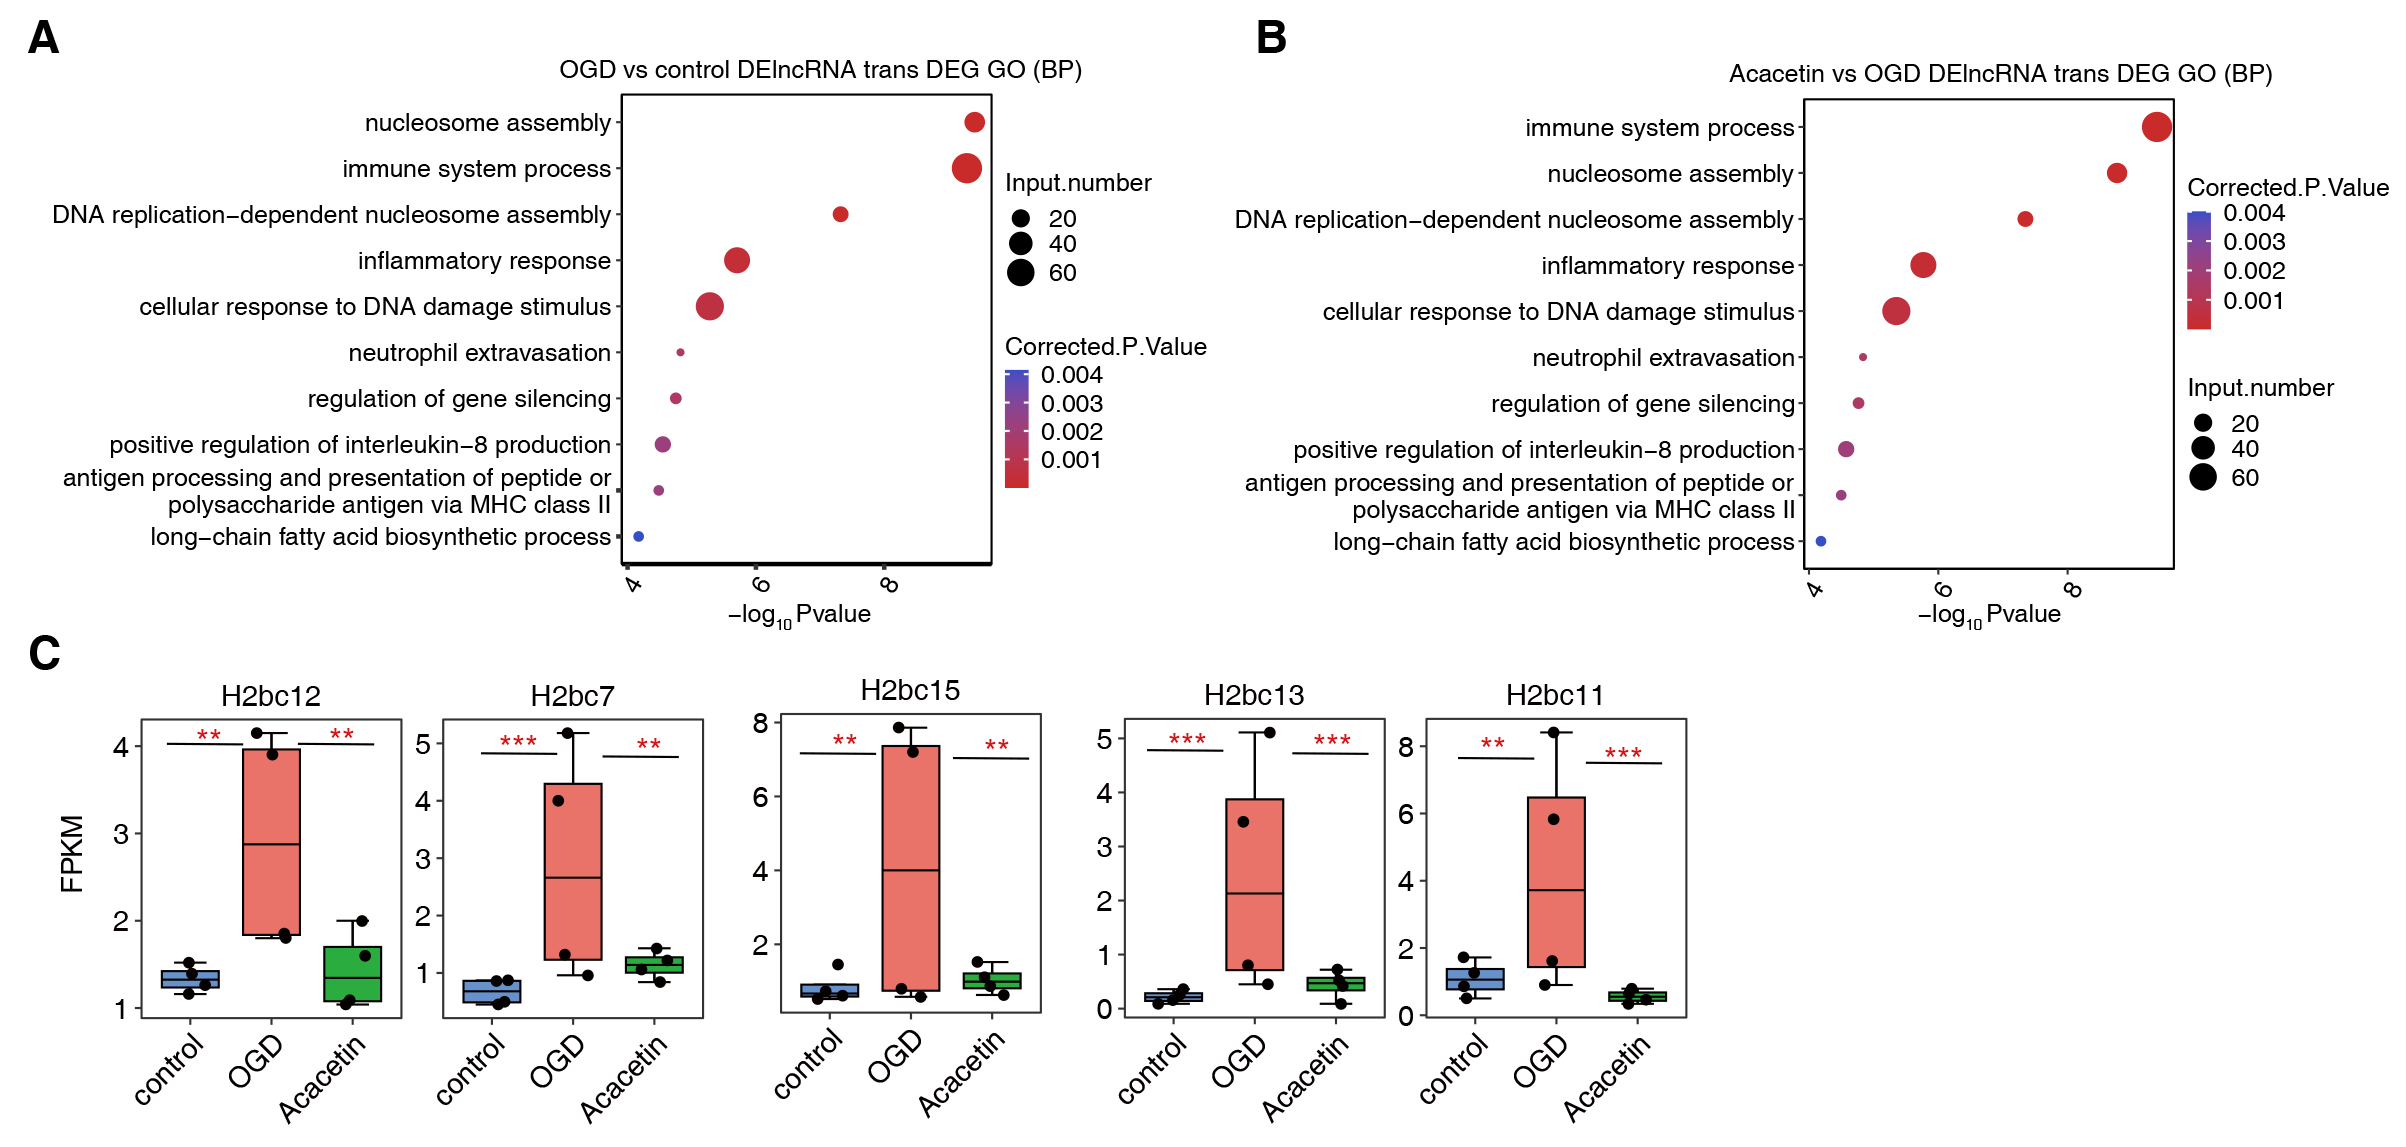


**FigS3.** Analysis of trans target genes of DElncRNA GO enrichment. (A) Bubble Diagram exhibiting the most enriched GO biological process results of the trans-target DEGs of DElncRNAs in the group OGD vs control. (B) Bubble Diagram exhibiting the most enriched GO biological process results of the trans-target DEGs of DElncRNAs in the group Acacetin vs OGD. (C) Box plot show the FPKM of important trans-target DEGs. Error bars represent mean ± SEM. ** P-value < 0.01, *** P-value < 0.001.
